# Supplementary material for: Integration of Antifouling and Underwater Sound Absorption Properties into PDMS/MWCNT/SiO2 Coatings
Source: MDPI journal article supplement (doi:10.3390/biomimetics7040248), 2022-12-18
Supplement: s1 [file s1]

# **Integration of antifouling and underwater sound absorption properties into PDMS/MWCNT/SiO<sub>2</sub> nanocomposites**

Pan Cao<sup>1\*</sup>, Huming Wang<sup>1</sup>, Mingyi Zhu<sup>1</sup>, Yifeng Fu<sup>2\*</sup>, Chengqing Yuan<sup>3,4\*</sup>

<sup>1</sup>College of Mechanical Engineering, Yangzhou University, Yangzhou 225127, China

<sup>2</sup>School of Automobile and Traffic Engineering, Jiangsu University, Zhenjiang 212013, China

<sup>3</sup>National Engineering Research Center for Water Transportation Safety, Reliability Engineering Institute, Wuhan University of Technology, Wuhan 430063, China

<sup>4</sup>School of Transportation and Logistics Engineering, Wuhan University of Technology, Wuhan 430063, China

**Corresponding Authors:** Pan Cao, E-mail: caopan@yzu.edu.cn

Yifeng Fu, E-mail: fu\_yifeng@163.com; Chengqing Yuan, Email: ycq@whut.edu.cn

**Supplementary information**

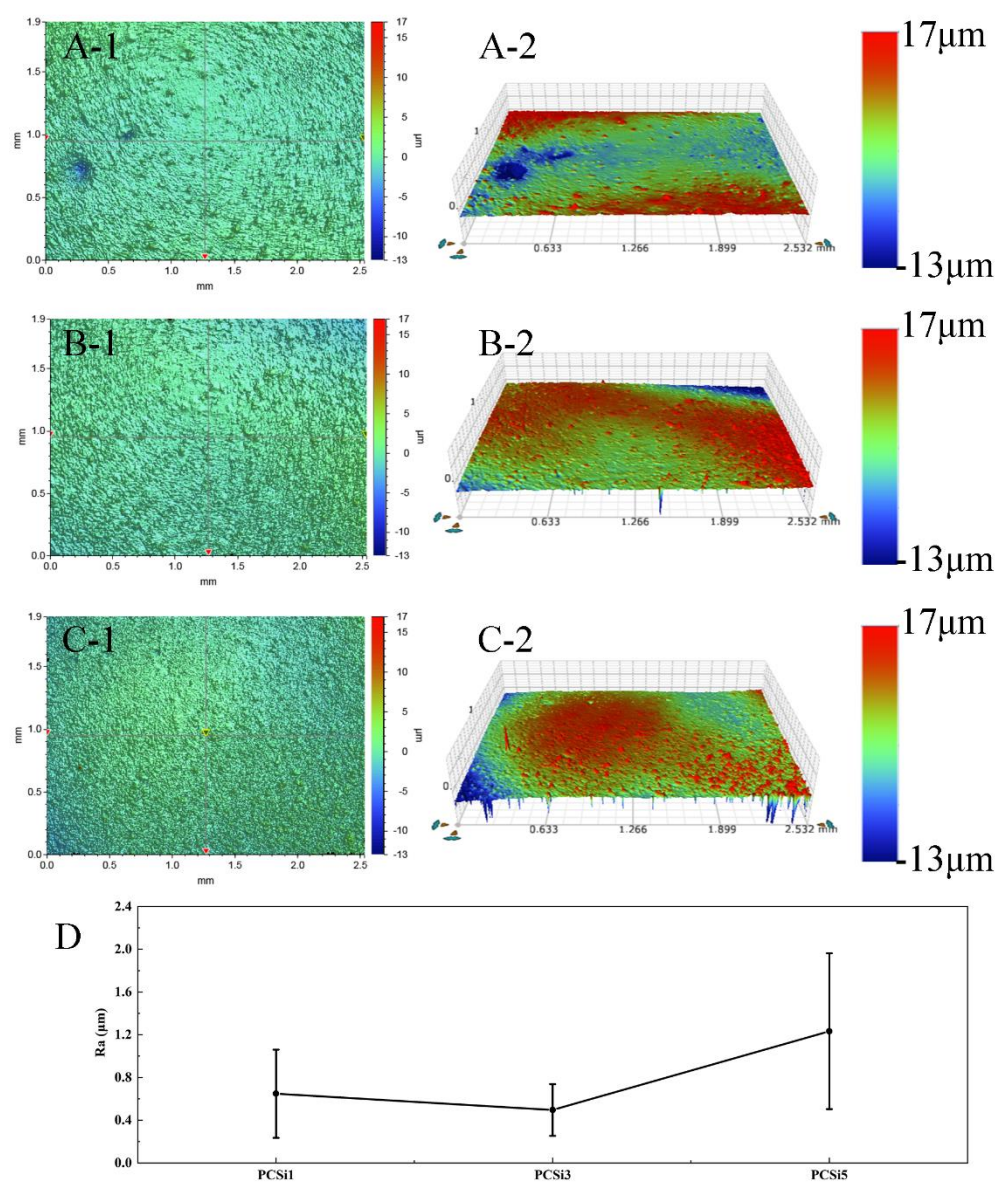

**Figure S1.** A-C: Surface profile of PCSi1, PCSi3, PCSi5. D: Surface roughness  $R_a$ .

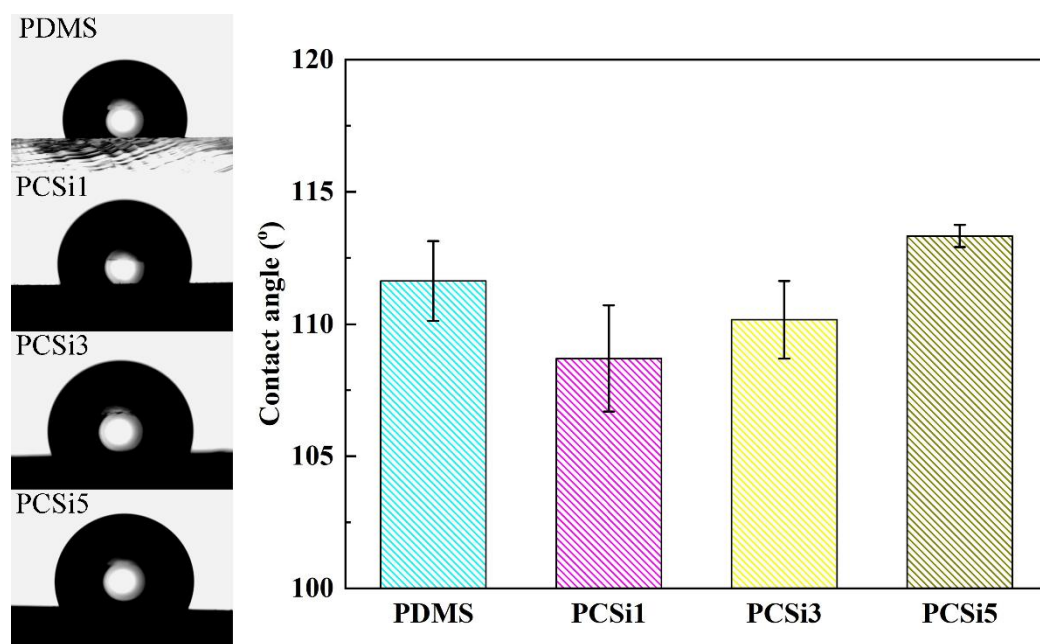

**Figure S2.** Contact angles of surface of different samples.

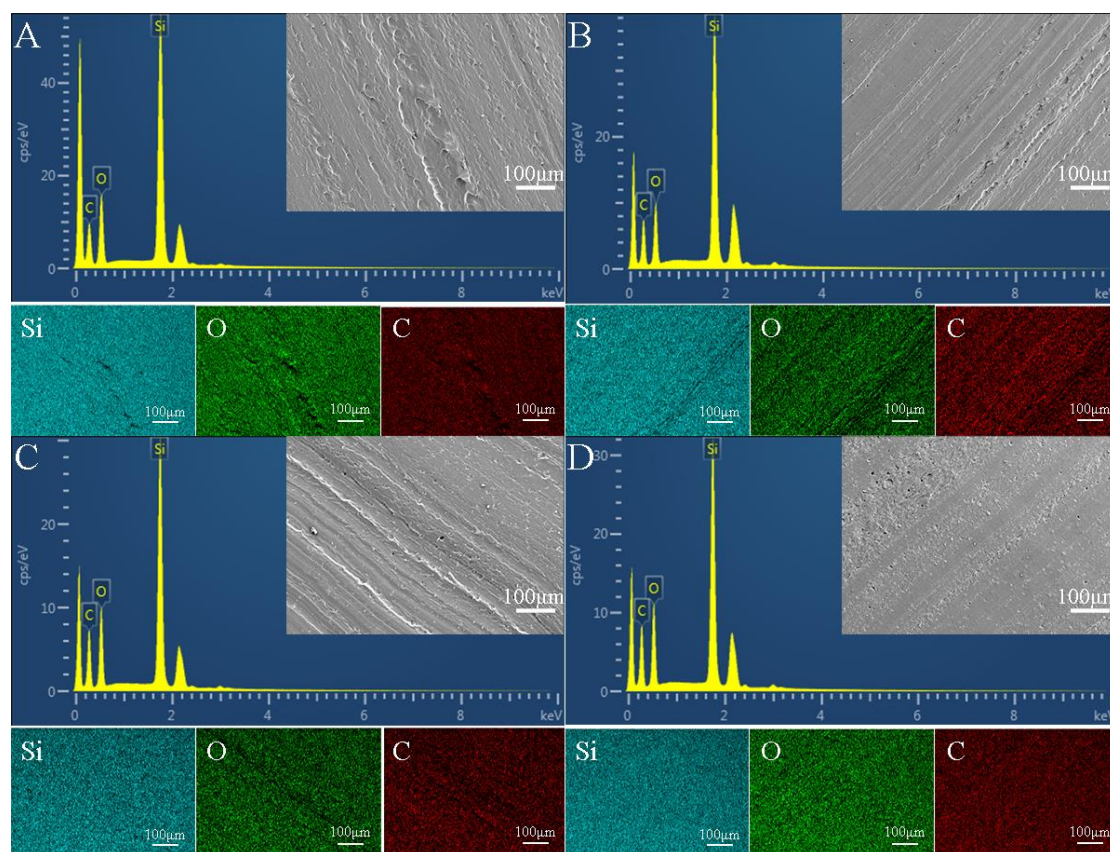

**Figure S3.** EDS analysis of PDMS (A), PCSi1 (B), PCSi3 (C), PCSi5 (D).

**Table S1.** The contents of different elements collected by EDS

| <b>Samples</b> | <b>C (wt%)</b> | <b>O (wt%)</b> | <b>Si (wt%)</b> |
|----------------|----------------|----------------|-----------------|
| <b>PDMS</b>    | 34.36          | 18.14          | 47.50           |
| <b>PCSi1</b>   | 36.22          | 21.57          | 42.21           |
| <b>PCSi3</b>   | 36.55          | 22.36          | 41.09           |
| <b>PCSi5</b>   | 33.04          | 22.06          | 44.90           |
